# Supplementary material for: Beam size limit for pencil minibeam radiotherapy determined from side effects in an in-vivo mouse ear model
Source: PLoS One. 2019 Sep 4;14(9):e0221454. doi: 10.1371/journal.pone.0221454 (PMC6726230; doi:10.1371/journal.pone.0221454)
Supplement: S1 Table — Every measurement was repeated thrice and the scoring was performed under four eyes principle. (XLSX) [file pone.0221454.s001.xlsx]

## Sheet: 0.5 mm
Mouse: 19	cage:	4	# lines:	4		anesthesia:				irradiated:		2015-07-02 11:42:00				Mouse: 20	cage:	5	# lines:	0		anesthesia:				irradiated:		2015-07-02 12:54:00				Mouse: 21	cage:	5	# lines:	1		anesthesia:				irradiated:		2015-07-02 13:50:00				Mouse: 22	cage:
Date	Right Ear Thickness [µm]	Right Mean [µm]	SEM [µm]	Left Ear Thickness [µm]	Left Mean [µm]	SEM [µm]	Erythema	Desquamation inside (crust size)	Desquamation outside (crust size)	Ear mor-phology changes	Hair loss	Pain during meas.	Other ear conditions	General condition	Remarks	Date	Right Ear Thickness [µm]	Right Mean [µm]	SEM [µm]	Left Ear Thickness [µm]	Left Mean [µm]	SEM [µm]	Erythema	Desquamation inside (crust size)	Desquamation outside (crust size)	Ear mor-phology changes	Hair loss	Pain during meas.	Other ear conditions	General condition	Remarks	Date	Right Ear Thickness [µm]	Right Mean [µm]	SEM [µm]	Left Ear Thickness [µm]	Left Mean [µm]	SEM [µm]	Erythema	Desquamation inside (crust size)	Desquamation outside (crust size)	Ear mor-phology changes	Hair loss	Pain during meas.	Other ear conditions	General condition	Remarks	Date	Right Ear Thickness [µm]
2015-06-29 18:30:00	215	213.333	1.66667	215	213.333	1.66667	no	no	no	no	no	no	no	normal		2015-06-29 18:30:00	215	215	0	215	211.667	1.66667	no	no	no	no	no	no	no	normal		2015-06-29 18:30:00	205	201.667	1.66667	215	210	2.88675	no	no	no	no	no	no	no	normal		2015-06-29 18:30:00	200
	215			210													215			210													200			210													195
	210			215													215			210													200			205													195
2015-07-06 11:45:00	220	213.333	3.33333	220	221.667	1.66667	no	no	no	no	no	no	no	normal		2015-07-06 11:30:00	225	226.667	1.66667	205	200	2.88675	no	no	no	no	no	no	no	normal		2015-07-06 11:30:00	215	216.667	1.66667	220	218.333	1.66667	no	no	no	no	no	no	no	normal		2015-07-06 11:30:00	220
	210			225													230			200													215			220													215
	210			220													225			195													220			215													210
2015-07-10 18:10:00	225	231.667	3.33333	230	228.333	1.66667	no	no	no	no	no	no	no	normal		2015-07-10 18:15:00	225	225	0	225	226.667	1.66667	no	no	no	no	no	no	no	normal		2015-07-10 18:15:00	225	223.333	1.66667	230	226.667	1.66667	no	no	no	no	no	no	no	normal		2015-07-10 18:15:00	225
	235			225													225			230													220			225													230
	235			230													225			225													225			225													235
2015-07-13 08:35:00	225	230	2.88675	230	230	2.88675	no	no	no	no	no	no	no	normal		2015-07-13 08:40:00	230	230	0	230	233.333	3.33333	no	no	no	no	no	no	no	normal		2015-07-13 08:40:00	225	230	2.88675	225	230	2.88675	no	no	no	no	no	no	no	normal		2015-07-13 08:40:00	205
	230			225													230			230													230			230													210
	235			235													230			240													235			235													215
2015-07-16 08:45:00	220	216.667	1.66667	230	231.667	1.66667	no	no	no	no	no	no	no	normal		2015-07-16 09:00:00	225	223.333	1.66667	230	226.667	1.66667	no	no	no	no	no	no	no	normal		2015-07-16 09:00:00	235	230	2.88675	230	233.333	3.33333	no	no	no	no	no	no	no	normal		2015-07-16 09:00:00	225
	215			230													225			225													230			230													215
	215			235													220			225													225			240													215
2015-07-18 20:00:00	220	225	2.88675	230	228.333	1.66667	no	no	no	no	no	no	no	normal		2015-07-18 20:05:00	215	215	0	215	220	2.88675	no	no	no	no	no	no	no	normal		2015-07-18 20:05:00	210	216.667	4.40959	230	230	0	no	no	no	no	no	no	no	normal		2015-07-18 20:05:00	220
	225			230													215			220													215			230													220
	230			225													215			225													225			230													220
2015-07-20 09:10:00	235	233.333	1.66667	230	231.667	1.66667	no	no	no	no	no	no	no	normal		2015-07-20 09:20:00	225	230	2.88675	225	230	2.88675	no	no	no	no	no	no	no	normal		2015-07-20 09:20:00	225	226.667	1.66667	230	233.333	1.66667	no	no	no	no	no	no	no	normal		2015-07-20 09:20:00	225
	230			230													230			230													225			235													225
	235			235													235			235													230			235													235
2015-07-22 09:15:00	230	233.333	1.66667	235	236.667	1.66667	no	no	no	no	no	no	no	normal		2015-07-22 09:20:00	230	233.333	3.33333	225	226.667	1.66667	no	no	no	no	no	no	no	normal		2015-07-22 09:20:00	235	233.333	1.66667	230	228.333	1.66667	no	no	no	no	no	no	no	normal		2015-07-22 09:20:00	225
	235			235													230			225													230			230													220
	235			240													240			230													235			225													215
2015-07-24 18:20:00	245	248.333	1.66667	235	236.667	1.66667	no	no	no	no	no	no	no	normal		2015-07-24 18:30:00	225	226.667	1.66667	215	220	2.88675	no	no	no	no	no	no	no	normal		2015-07-24 18:30:00	225	226.667	1.66667	225	225	0	no	no	no	no	no	no	no	normal		2015-07-24 18:30:00	220
	250			240													230			220													230			225													225
	250			235													225			225													225			225													220
2015-07-26 20:25:00	235	233.333	1.66667	230	226.667	3.33333	no	no	no	no	no	no	no	normal		2015-07-26 20:30:00	220	221.667	1.66667	210	210	0	no	no	no	no	no	no	no	normal		2015-07-26 20:30:00	215	221.667	3.33333	230	230	0	no	no	no	no	no	no	no	normal		2015-07-26 20:30:00	215
	235			230													225			210													225			230													215
	230			220													220			210													225			230													220
[truncated: 14 more columns]

## Sheet: 1 mm
Mouse: 16	cage:	4	# lines:	1		anesthesia:				irradiated:		2015-06-18 10:42:00				Mouse: 17	cage:	4	# lines:	2		anesthesia:				irradiated:		2015-07-02 10:02:00				Mouse: 18	cage:	4	# lines:	3		anesthesia:				irradiated:		2015-07-02 10:47:00				Mouse: 24	cage:
Date	Right Ear Thickness [µm]	Right Mean [µm]	SEM [µm]	Left Ear Thickness [µm]	Left Mean [µm]	SEM [µm]	Erythema	Desquamation inside (crust size)	Desquamation outside (crust size)	Ear mor-phology changes	Hair loss	Pain during meas.	Other ear conditions	General condition	Remarks	Date	Right Ear Thickness [µm]	Right Mean [µm]	SEM [µm]	Left Ear Thickness [µm]	Left Mean [µm]	SEM [µm]	Erythema	Desquamation inside (crust size)	Desquamation outside (crust size)	Ear mor-phology changes	Hair loss	Pain during meas.	Other ear conditions	General condition	Remarks	Date	Right Ear Thickness [µm]	Right Mean [µm]	SEM [µm]	Left Ear Thickness [µm]	Left Mean [µm]	SEM [µm]	Erythema	Desquamation inside (crust size)	Desquamation outside (crust size)	Ear mor-phology changes	Hair loss	Pain during meas.	Other ear conditions	General condition	Remarks	Date	Right Ear Thickness [µm]
2015-06-18 12:00:00	235	231.667	1.66667	220	225	2.88675	no	no	no	no	no	no	no	normal		2015-06-29 18:30:00	200	196.667	1.66667	215	211.667	1.66667	no	no	no	no	no	no	no	normal		2015-06-29 18:30:00	205	210	2.88675	215	215	0	no	no	no	no	no	no	no	normal		2015-06-29 18:00:00	210
	230			230													195			210													210			215													215
	230			225													195			210													215			215													210
2015-06-22 17:30:00	220	221.667	1.66667	215	213.333	1.66667	no	no	no	no	no	no	no	normal		2015-07-06 11:45:00	215	211.667	1.66667	215	216.667	1.66667	no	no	no	no	no	no	no	normal		2015-07-06 11:45:00	215	216.667	1.66667	220	221.667	1.66667	no	no	no	no	no	no	no	normal		2015-07-06 11:15:00	210
	225			215													210			220													220			225													210
	220			210													210			215													215			220													210
2015-06-26 18:00:00	220	218.333	1.66667	210	210	0	no	no	no	no	no	no	no	normal		2015-07-10 18:10:00	210	213.333	3.33333	240	238.333	1.66667	no	no	no	no	no	no	no	normal		2015-07-10 18:10:00	225	228.333	1.66667	220	218.333	1.66667	no	no	no	no	no	no	no	normal		2015-07-10 18:20:00	210
	220			210													210			240													230			220													210
	215			210													220			235													230			215													205
2015-06-29 18:30:00	205	206.667	1.66667	200	196.667	1.66667	no	no	no	no	no	no	no	normal		2015-07-13 08:35:00	220	221.667	1.66667	220	221.667	1.66667	no	no	no	no	no	no	no	normal		2015-07-13 08:35:00	230	228.333	1.66667	230	235	2.88675	no	no	no	no	no	no	no	normal		2015-07-13 08:30:00	225
	205			195													225			220													230			235													225
	210			195													220			225													225			240													220
2015-07-02 10:30:00	220	218.333	1.66667	220	218.333	1.66667	no	no	no	no	no	no	no	normal		2015-07-16 08:45:00	220	220	0	225	225	0	no	no	no	no	no	no	no	normal		2015-07-16 08:45:00	225	230	2.88675	225	225	0	no	no	no	no	no	no	no	normal		2015-07-16 08:45:00	220
	220			215													220			225													235			225													220
	215			220													220			225													230			225													210
2015-07-04 09:30:00	230	231.667	1.66667	225	223.333	1.66667	no	no	no	no	no	no	no	normal		2015-07-18 20:00:00	220	220	0	225	225	0	no	no	no	no	no	no	no	normal		2015-07-18 20:00:00	220	225	2.88675	225	221.667	1.66667	no	no	no	bend	no	no	no	normal		2015-07-18 19:55:00	220
	230			225													220			225													225			220													215
	235			220													220			225													230			220													220
2015-07-06 11:45:00	225	223.333	1.66667	215	216.667	1.66667	no	no	no	no	no	no	no	normal		2015-07-20 09:10:00	235	233.333	1.66667	225	221.667	1.66667	no	no	no	no	no	no	no	normal		2015-07-20 09:10:00	230	230	0	230	230	0	no	no	no	no	no	no	no	normal		2015-07-20 09:40:00	220
	225			220													230			220													230			230													220
	220			215													235			220													230			230													215
2015-07-08 10:55:00	230	230	0	235	233.333	1.66667	mild	no	no	no	no	no	no	normal		2015-07-22 09:15:00	220	223.333	3.33333	225	225	0	no	no	no	no	no	no	no	normal		2015-07-22 09:15:00	235	235	0	225	228.333	1.66667	no	no	no	no	no	no	no	normal		2015-07-22 09:00:00	225
	230			235													220			225													235			230													220
	230			230													230			225													235			230													225
2015-07-10 18:10:00	260	251.667	4.40959	230	233.333	1.66667	mild	no	no	no	no	no	no	normal		2015-07-24 18:20:00	235	226.667	4.40959	220	225	2.88675	no	no	no	no	no	no	no	normal		2015-07-24 18:20:00	240	243.333	1.66667	230	233.333	1.66667	no	no	no	bend	no	no	no	normal		2015-07-24 18:35:00	215
	250			235													220			225													245			235													220
	245			235													225			230													245			235													220
2015-07-12 16:30:00	240	241.667	1.66667	215	213.333	1.66667	no	no	no	no	no	no	no	normal		2015-07-26 20:25:00	220	223.333	1.66667	220	220	0	no	no	no	no	no	no	no	normal		2015-07-26 20:25:00	220	223.333	1.66667	225	226.667	1.66667	no	no	no	bend	no	no	no	normal		2015-07-26 20:20:00	225
	240			215													225			220													225			225													225
	245			210													225			220													225			230													225
[truncated: 14 more columns]

## Sheet: 2 mm
Mouse: 13	cage:	3	# lines:	3		anesthesia:				irradiated:		2015-06-17 17:03:00				Mouse: 14	cage:	3	# lines:	4		anesthesia:				irradiated:		2015-06-17 17:41:00				Mouse: 15	cage:	4	# lines:	0		anesthesia:				irradiated:		2015-06-18 10:03:00				Mouse: 23	cage:
Date	Right Ear Thickness [µm]	Right Mean [µm]	SEM [µm]	Left Ear Thickness [µm]	Left Mean [µm]	SEM [µm]	Erythema	Desquamation inside (crust size)	Desquamation outside (crust size)	Ear mor-phology changes	Hair loss	Pain during meas.	Other ear conditions	General condition	Remarks	Date	Right Ear Thickness [µm]	Right Mean [µm]	SEM [µm]	Left Ear Thickness [µm]	Left Mean [µm]	SEM [µm]	Erythema	Desquamation inside (crust size)	Desquamation outside (crust size)	Ear mor-phology changes	Hair loss	Pain during meas.	Other ear conditions	General condition	Remarks	Date	Right Ear Thickness [µm]	Right Mean [µm]	SEM [µm]	Left Ear Thickness [µm]	Left Mean [µm]	SEM [µm]	Erythema	Desquamation inside (crust size)	Desquamation outside (crust size)	Ear mor-phology changes	Hair loss	Pain during meas.	Other ear conditions	General condition	Remarks	Date	Right Ear Thickness [µm]
2015-06-17 18:00:00	220	221.667	1.66667	230	223.333	3.33333	no	no	no	no	no	no	no	normal		2014-06-17 18:00:00	225	223.333	1.66667	230	231.667	1.66667	no	no	no	no	no	no	no	normal		2014-06-18 12:00:00	225	226.667	1.66667	230	228.333	1.66667	no	no	no	no	no	no	no	normal		2015-06-29 18:00:00	210
	225			220													225			230													230			225													205
	220			220													220			235													225			230													200
2015-06-22 17:30:00	220	220	0	225	226.667	1.66667	no	no	no	no	no	no	no	normal		2015-06-22 17:30:00	225	220	2.88675	220	220	0	no	no	no	no	no	no	no	normal		2015-06-22 17:30:00	220	215	2.88675	215	213.333	1.66667	no	no	no	no	no	no	no	normal		2015-07-06 11:15:00	205
	220			230													220			220													215			215													210
	220			225													215			220													210			210													210
2015-06-26 18:00:00	215	213.333	1.66667	205	205	0	no	no	no	no	no	no	no	normal		2015-06-26 18:00:00	215	215	0	210	201.667	4.40959	no	no	no	no	no	no	no	normal		2015-06-26 18:00:00	230	223.333	3.33333	220	215	2.88675	no	no	no	no	no	no	no	normal		2015-07-10 18:20:00	215
	215			205													215			200													220			215													220
	210			205													215			195													220			210													220
2015-06-29 18:30:00	205	201.667	1.66667	200	200	0	no	no	no	no	no	no	no	normal		2015-06-29 18:30:00	210	206.667	1.66667	210	206.667	1.66667	no	no	no	no	no	no	no	normal		2015-06-29 18:30:00	210	206.667	1.66667	215	210	2.88675	no	no	no	no	no	no	no	normal		2015-07-13 08:30:00	210
	200			200													205			205													205			210													205
	200			200													205			205													205			205													215
2015-07-02 12:30:00	225	225	0	215	216.667	1.66667	no	no	no	no	no	no	no	normal		2015-07-02 12:30:00	220	220	0	225	220	2.88675	no	no	no	no	no	no	no	normal		2015-07-02 10:30:00	215	213.333	1.66667	220	218.333	1.66667	mild	no	no	no	no	no	no	normal		2015-07-16 08:45:00	225
	225			215													220			215													210			215													225
	225			220													220			220													215			220													230
2015-07-04 09:40:00	225	223.333	1.66667	215	216.667	1.66667	no	no	no	bend	no	no	no	normal		2015-07-04 09:40:00	235	235	0	215	213.333	1.66667	no	no	no	no	no	no	no	normal		2015-07-04 09:30:00	220	223.333	1.66667	220	216.667	1.66667	no	no	no	no	no	no	no	normal		2015-07-18 19:55:00	225
	225			215													235			210													225			215													225
	220			220													235			215													225			215													220
2015-07-06 12:00:00	225	220	2.88675	215	211.667	3.33333	no	no	no	bend	no	no	no	normal		2015-07-06 12:00:00	225	221.667	1.66667	220	210	5	no	no	no	no	no	no	no	normal		2015-07-06 11:45:00	215	218.333	1.66667	225	223.333	1.66667	no	no	no	no	no	no	no	normal		2015-07-20 09:40:00	215
	220			215													220			205													220			220													220
	215			205													220			205													220			225													220
2015-07-08 10:45:00	235	235	0	215	215	0	mild	no	no	bend	no	no	no	normal		2015-07-08 10:45:00	250	246.667	1.66667	220	221.667	1.66667	mild	no	no	no	no	no	no	normal		2015-07-08 10:55:00	240	241.667	1.66667	230	230	0	no	no	no	no	no	no	no	normal		2015-07-22 09:00:00	225
	235			215													245			220													240			230													225
	235			215													245			225													245			230													220
2015-07-10 18:00:00	290	288.333	1.66667	210	210	0	mild	no	no	no	no	no	no	normal		2015-07-10 18:00:00	260	260	0	225	226.667	1.66667	no	no	no	no	no	no	no	normal		2015-07-10 18:10:00	265	256.667	4.40959	200	196.667	1.66667	mild	no	no	no	no	no	no	normal		2015-07-24 18:35:00	220
	290			210													260			225													255			195													220
	285			210													260			230													250			195													215
2015-07-12 16:35:00	340	336.667	1.66667	225	225	0	mild	no	dry	no	no	no	no	normal		2015-07-12 16:35:00	315	311.667	1.66667	240	238.333	1.66667	mild	no	no	no	no	no	no	normal		2015-07-12 16:30:00	280	278.333	1.66667	225	223.333	1.66667	mild	no	no	no	no	no	no	normal		2015-07-26 20:20:00	225
	335			225													310			240													280			220													220
	335			225													310			235													275			225													220
[truncated: 14 more columns]

## Sheet: 3 mm
Mouse: 10	cage:	3	# lines:	0		anesthesia:				irradiated:		2015-06-17 15:21:00				Mouse: 11	cage:	3	# lines:	1		anesthesia:				irradiated:		2015-06-17 15:55:00				Mouse: 12	cage:	3	# lines:	2		anesthesia:				irradiated:		2015-06-17 16:29:00
Date	Right Ear Thickness [µm]	Right Mean [µm]	SEM [µm]	Left Ear Thickness [µm]	Left Mean [µm]	SEM [µm]	Erythema	Desquamation inside (crust size)	Desquamation outside (crust size)	Ear mor-phology changes	Hair loss	Pain during meas.	Other ear conditions	General condition	Remarks	Date	Right Ear Thickness [µm]	Right Mean [µm]	SEM [µm]	Left Ear Thickness [µm]	Left Mean [µm]	SEM [µm]	Erythema	Desquamation inside (crust size)	Desquamation outside (crust size)	Ear mor-phology changes	Hair loss	Pain during meas.	Other ear conditions	General condition	Remarks	Date	Right Ear Thickness [µm]	Right Mean [µm]	SEM [µm]	Left Ear Thickness [µm]	Left Mean [µm]	SEM [µm]	Erythema	Desquamation inside (crust size)	Desquamation outside (crust size)	Ear mor-phology changes	Hair loss	Pain during meas.	Other ear conditions	General condition	Remarks
2015-06-17 18:00:00	225	223.333	1.66667	230	228.333	1.66667	no	no	no	no	no	no	no	normal		2015-06-17 18:00:00	230	226.667	1.66667	235	231.667	1.66667	no	no	no	no	no	no	no	normal		2015-06-17 18:00:00	230	226.667	3.33333	225	221.667	1.66667	no	no	no	no	no	no	no	normal
	220			230													225			230													230			220
	225			225													225			230													220			220
2015-06-22 17:30:00	225	225	0	215	211.667	1.66667	no	no	no	no	no	no	no	normal		2015-06-22 17:30:00	220	221.667	1.66667	220	218.333	1.66667	no	no	no	no	no	no	no	normal		2015-06-22 17:30:00	225	221.667	1.66667	215	213.333	1.66667	no	no	no	no	no	no	no	normal
	225			210													220			220													220			215
	225			210													225			215													220			210
2015-06-26 18:00:00	215	215	0	205	203.333	1.66667	no	no	no	no	no	no	no	normal		2015-06-26 18:00:00	215	215	2.88675	210	211.667	1.66667	no	no	no	no	no	no	no	normal		2015-06-26 18:00:00	225	221.667	3.33333	215	208.333	4.40959	mild	no	no	no	no	no	no	normal
	215			205													220			210													225			210
	215			200													210			215													215			200
2015-06-29 18:30:00	215	208.333	3.33333	210	203.333	3.33333	mild	no	no	no	no	no	no	normal		2015-06-29 18:30:00	215	213.333	1.66667	210	211.667	1.66667	mild	no	no	no	no	no	no	normal		2015-06-29 18:30:00	200	203.333	3.33333	200	196.667	1.66667	no	no	no	no	no	no	no	normal
	205			200													215			210													210			195
	205			200													210			215													200			195
2015-07-02 12:30:00	225	225	0	220	221.667	1.66667	mild	no	no	no	no	no	no	normal		2015-07-02 12:30:00	240	240	0	220	223.333	1.66667	mild	no	no	bend	no	no	no	normal		2015-07-02 12:30:00	230	226.667	3.33333	225	226.667	1.66667	no	no	no	no	no	no	no	normal
	225			225													240			225													230			225
	225			220													240			225													220			230
2015-07-04 09:40:00	235	231.667	1.66667	215	215	0	mild	no	no	no	no	no	no	normal		2015-07-04 09:40:00	225	225	0	225	223.333	1.66667	no	no	no	no	no	no	no	normal		2015-07-04 09:40:00	230	226.667	1.66667	215	215	0	mild	no	no	bend	no	no	no	normal
	230			215													225			225													225			215
	230			215													225			220													225			215
2015-07-06 12:00:00	225	225	0	215	213.333	1.66667	mild	no	no	no	no	no	no	normal		2015-07-06 12:00:00	240	243.333	1.66667	220	220	0	mild	no	no	bend	no	no	no	normal		2015-07-06 12:00:00	220	215	2.88675	215	213.333	1.66667	no	no	no	no	no	no	no	normal
	225			215													245			220													215			215
	225			210													245			220													210			210
2015-07-08 10:45:00	260	256.667	1.66667	220	220	0	mild	no	no	no	no	no	no	normal		2015-07-08 10:45:00	275	271.667	1.66667	225	220	2.88675	mild	no	no	no	no	no	no	normal		2015-07-08 10:45:00	250	253.333	3.33333	225	223.333	1.66667	mild	no	no	no	no	no	no	normal
	255			220													270			220													250			225
	255			220													270			215													260			220
2015-07-10 18:00:00	295	296.667	1.66667	215	215	0	mild	no	no	no	no	no	no	normal		2015-07-10 18:00:00	275	268.333	3.33333	220	221.667	1.66667	mild	no	no	no	no	no	no	normal		2015-07-10 18:00:00	280	275	2.88675	215	210	2.88675	mild	no	no	bend	no	no	no	normal
	300			215													265			220													275			210
	295			215													265			225													270			205
2015-07-12 16:35:00	345	350	2.88675	225	225	0	definite	no	dry	no	no	no	no	normal		2015-07-12 16:35:00	320	325	2.88675	230	235	2.88675	definite	no	dry	no	no	no	no	normal		2015-07-12 16:35:00	340	340	0	225	226.667	1.66667	definite	no	dry	no	no	no	no	normal
	350			225													325			235													340			225
	355			225													330			240													340			230

## Sheet: 4 mm
Mouse: 7	cage:	2	# lines:	2		anesthesia:				irradiated:		2015-06-17 13:33:00				Mouse: 8	cage:	2	# lines:	3		anesthesia:				irradiated:		2015-06-17 14:13:00				Mouse: 9	cage:	2	# lines:	4		anesthesia:				irradiated:		2015-06-17 14:47:00
Date	Right Ear Thickness [µm]	Right Mean [µm]	SEM [µm]	Left Ear Thickness [µm]	Left Mean [µm]	SEM [µm]	Erythema	Desquamation inside (crust size)	Desquamation outside (crust size)	Ear mor-phology changes	Hair loss	Pain during meas.	Other ear conditions	General condition	Remarks	Date	Right Ear Thickness [µm]	Right Mean [µm]	SEM [µm]	Left Ear Thickness [µm]	Left Mean [µm]	SEM [µm]	Erythema	Desquamation inside (crust size)	Desquamation outside (crust size)	Ear mor-phology changes	Hair loss	Pain during meas.	Other ear conditions	General condition	Remarks	Date	Right Ear Thickness [µm]	Right Mean [µm]	SEM [µm]	Left Ear Thickness [µm]	Left Mean [µm]	SEM [µm]	Erythema	Desquamation inside (crust size)	Desquamation outside (crust size)	Ear mor-phology changes	Hair loss	Pain during meas.	Other ear conditions	General condition	Remarks
2015-06-17 18:00:00	215	215	0	210	208.333	1.66667	no	no	no	no	no	no	no	normal		2015-06-17 18:00:00	210	215	5	215	216.667	1.66667	no	no	no	no	no	no	no	normal		2015-06-17 18:00:00	195	193.333	1.66667	210	206.667	1.66667	no	no	no	no	no	no	no	normal
	215			205													225			215													195			205
	215			210													210			220													190			205
2015-06-22 17:30:00	220	216.667	3.33333	215	211.667	1.66667	no	no	no	no	no	no	no	normal		2015-06-22 17:30:00	225	223.333	1.66667	215	211.667	1.66667	no	no	no	no	no	no	no	normal		2015-06-22 17:30:00	215	216.667	1.66667	220	215	2.88675	no	no	no	no	no	no	no	normal
	220			210													225			210													220			215
	210			210													220			210													215			210
2015-06-26 18:00:00	220	220	0	210	201.667	4.40959	no	no	no	no	no	no	no	normal		2015-06-26 18:00:00	215	216.667	1.66667	200	203.333	1.66667	no	no	no	no	no	no	no	normal		2015-06-26 18:00:00	220	213.333	3.33333	210	206.667	1.66667	no	no	no	no	no	no	no	normal
	220			200													215			205													210			205
	220			195													220			205													210			205
2015-06-29 18:30:00	210	210	0	195	195	2.88675	mild	no	no	no	no	no	no	normal		2015-06-29 18:30:00	215	211.667	1.66667	210	203.333	3.33333	no	no	no	no	no	no	no	normal		2015-06-29 18:30:00	210	208.333	1.66667	200	200	0	no	no	no	no	no	no	no	normal
	210			200													210			200													210			200
	210			190													210			200													205			200
2015-07-02 12:15:00	230	230	0	215	213.333	1.66667	no	no	no	no	no	no	no	normal		2015-07-02 12:15:00	250	246.667	1.66667	220	220	0	mild	no	no	no	no	no	no	normal		2015-07-02 12:15:00	245	245	0	210	213.333	1.66667	mild	no	no	bend	no	no	no	normal
	230			215													245			220													245			215
	230			210													245			220													245			215
2015-07-04 09:50:00	245	241.667	1.66667	215	215	0	no	no	no	no	no	no	no	normal		2015-07-04 09:50:00	270	263.333	3.33333	215	215	0	mild	no	no	no	no	no	no	normal		2015-07-04 09:50:00	235	231.667	1.66667	215	213.333	1.66667	mild	no	no	bend	no	no	no	normal
	240			215													260			215													230			215
	240			215													260			215													230			210
2015-07-06 12:25:00	240	241.667	1.66667	225	220	2.88675	mild	no	no	no	no	no	no	normal		2015-07-06 12:25:00	290	285	2.88675	215	216.667	1.66667	mild	no	no	no	no	no	no	normal		2015-07-06 12:25:00	270	268.333	1.66667	215	211.667	1.66667	mild	no	no	no	no	no	no	normal
	240			220													280			215													265			210
	245			215													285			220													270			210
2015-07-08 10:30:00	260	263.333	6.00925	220	220	0	mild	no	no	no	no	no	no	normal		2015-07-08 10:30:00	340	335	2.88675	225	218.333	3.33333	mild	no	no	no	no	no	no	normal		2015-07-08 10:30:00	315	313.333	1.66667	225	225	0	mild	no	no	bend	no	no	no	normal
	275			220													335			215													310			225
	255			220													330			215													315			225
2015-07-10 17:40:00	305	301.667	3.33333	215	213.333	1.66667	mild	no	no	no	no	no	no	normal		2015-07-10 17:40:00	490	475	7.63763	215	220	2.88675	definite	dry	crust	no	no	no	no	normal		2015-07-10 17:40:00	390	383.333	3.33333	220	220	0	definite	dry	dry	no	no	no	no	normal
	305			215													470			220													380			220
	295			210													465			225													380			220
2015-07-12 16:55:00	350	341.667	4.40959	235	235	0	definite	no	dry	no	no	no	no	normal		2015-07-12 16:55:00	520	510	5.7735	225	226.667	1.66667	definite	dry	crust	no	no	no	no	normal		2015-07-12 16:55:00	410	416.667	3.33333	235	231.667	1.66667	severe	dry	dry	no	no	no	no	normal
	340			235													510			225													420			230
	335			235													500			230													420			230

## Sheet: 5 mm
Mouse: 4	cage:	1	# lines:	4		anesthesia:				irradiated:		2015-06-17 11:43:00				Mouse: 5	cage:	2	# lines:	0		anesthesia:				irradiated:		2015-06-17 12:24:00				Mouse: 6	cage:	2	# lines:	1		anesthesia:				irradiated:		2015-06-17 12:58:00
Date	Right Ear Thickness [µm]	Right Mean [µm]	SEM [µm]	Left Ear Thickness [µm]	Left Mean [µm]	SEM [µm]	Erythema	Desquamation inside (crust size)	Desquamation outside (crust size)	Ear mor-phology changes	Hair loss	Pain during meas.	Other ear conditions	General condition	Remarks	Date	Right Ear Thickness [µm]	Right Mean [µm]	SEM [µm]	Left Ear Thickness [µm]	Left Mean [µm]	SEM [µm]	Erythema	Desquamation inside (crust size)	Desquamation outside (crust size)	Ear mor-phology changes	Hair loss	Pain during meas.	Other ear conditions	General condition	Remarks	Date	Right Ear Thickness [µm]	Right Mean [µm]	SEM [µm]	Left Ear Thickness [µm]	Left Mean [µm]	SEM [µm]	Erythema	Desquamation inside (crust size)	Desquamation outside (crust size)	Ear mor-phology changes	Hair loss	Pain during meas.	Other ear conditions	General condition	Remarks
2015-06-17 18:00:00	235	221.667	6.66667	225	218.333	4.40959	no	no	no	no	no	no	no	normal		2015-06-17 18:00:00	210	213.333	3.33333	220	221.667	1.66667	no	no	no	no	no	no	no	normal		2015-06-17 18:00:00	210	210	0	225	223.333	1.66667	no	no	no	no	no	no	no	normal
	215			220													220			220													210			225
	215			210													210			225													210			220
2015-06-22 17:30:00	220	220	0	200	200	0	no	no	no	no	no	no	no	normal		2015-06-22 17:30:00	225	230	2.88675	220	216.667	1.66667	no	no	no	no	no	no	no	normal		2015-06-22 17:30:00	220	218.333	1.66667	205	203.333	1.66667	no	no	no	no	no	no	no	normal
	220			200													230			215													220			205
	220			200													235			215													215			200
2015-06-26 18:00:00	220	220	0	220	215	2.88675	no	no	no	no	no	no	no	normal		2015-06-26 18:00:00	235	233.333	1.66667	205	205	0	no	no	no	no	no	no	no	normal		2015-06-26 18:00:00	225	225	0	220	216.667	1.66667	no	no	no	no	no	no	no	normal
	220			215													235			205													225			215
	220			210													230			205													225			215
2015-06-29 18:45:00	215	216.667	1.66667	205	210	2.88675	no	no	no	no	no	no	no	normal		2015-06-29 18:30:00	225	225	0	210	210	0	no	no	no	no	no	no	no	normal		2015-06-29 18:30:00	215	213.333	1.66667	205	206.667	1.66667	no	no	no	no	no	no	no	normal
	215			210													225			210													210			210
	220			215													225			210													215			205
2015-07-02 11:15:00	240	233.333	3.33333	210	211.667	1.66667	no	no	no	no	no	no	no	normal		2015-07-02 11:15:00	255	256.667	1.66667	220	223.333	1.66667	no	no	no	no	no	no	no	normal		2015-07-02 11:15:00	250	248.333	1.66667	230	228.333	1.66667	no	no	no	no	no	no	no	normal
	230			215													255			225													245			230
	230			210													260			225													250			225
2015-07-04 09:15:00	265	263.333	1.66667	215	215	0	no	no	no	no	no	no	no	normal		2015-07-04 09:50:00	270	271.667	1.66667	215	220	2.88675	mild	no	no	no	no	no	no	normal		2015-07-04 09:50:00	250	241.667	4.40959	215	211.667	1.66667	mild	no	no	no	no	no	no	normal
	265			215													275			220													240			210
	260			215													270			225													235			210
2015-07-06 12:10:00	285	278.333	3.33333	205	206.667	1.66667	mild	no	no	bend	no	no	no	normal		2015-07-06 12:25:00	315	316.667	1.66667	230	225	2.88675	mild	no	no	bend	no	no	no	normal		2015-07-06 12:25:00	260	261.667	1.66667	230	228.333	1.66667	mild	no	no	no	no	no	no	normal
	275			210													320			225													260			230
	275			205													315			220													265			225
2015-07-08 10:15:00	340	345	2.88675	220	221.667	1.66667	mild	no	no	bend	no	no	no	normal		2015-07-08 10:30:00	330	331.667	1.66667	225	223.333	1.66667	mild	no	no	no	no	no	no	normal		2015-07-08 10:30:00	305	306.667	1.66667	220	220	2.88675	mild	no	no	no	no	no	no	normal
	350			220													335			225													310			225
	345			225													330			220													305			215
2015-07-10 17:25:00	400	391.667	4.40959	215	215	0	definite	dry	dry	no	no	no	no	normal		2015-07-10 17:40:00	480	465	8.66025	215	216.667	1.66667	definite	dry	dry	no	no	no	no	normal		2015-07-10 17:40:00	350	348.333	1.66667	215	213.333	1.66667	mild	dry	dry	no	no	no	no	normal
	390			215													465			220													350			210
	385			215													450			215													345			215
2015-07-12 17:10:00	470	475	2.88675	220	216.667	1.66667	definite	dry	dry	no	no	no	no	normal		2015-07-12 16:55:00	475	466.667	4.40959	215	218.333	1.66667	severe	dry	dry	no	no	no	no	normal		2015-07-12 16:55:00	450	440	5	230	228.333	1.66667	severe	dry	dry	no	no	no	no	normal
	475			215													460			220													435			230
	480			215													465			220													435			225

## Sheet: 6 mm
Mouse: 1	cage:	1	# lines:	1		anesthesia:				irradiated:		2015-06-17 10:04:00				Mouse: 2	cage:	1	# lines:	2		anesthesia:				irradiated:		2015-06-17 10:41:00				Mouse: 3	cage:	1	# lines:	3		anesthesia:				irradiated:		2015-07-02 15:37:00
Date	Right Ear Thickness [µm]	Right Mean [µm]	SEM [µm]	Left Ear Thickness [µm]	Left Mean [µm]	SEM [µm]	Erythema	Desquamation inside (crust size)	Desquamation outside (crust size)	Ear mor-phology changes	Hair loss	Pain during meas.	Other ear conditions	General condition	Remarks	Date	Right Ear Thickness [µm]	Right Mean [µm]	SEM [µm]	Left Ear Thickness [µm]	Left Mean [µm]	SEM [µm]	Erythema	Desquamation inside (crust size)	Desquamation outside (crust size)	Ear mor-phology changes	Hair loss	Pain during meas.	Other ear conditions	General condition	Remarks	Date	Right Ear Thickness [µm]	Right Mean [µm]	SEM [µm]	Left Ear Thickness [µm]	Left Mean [µm]	SEM [µm]	Erythema	Desquamation inside (crust size)	Desquamation outside (crust size)	Ear mor-phology changes	Hair loss	Pain during meas.	Other ear conditions	General condition	Remarks
2015-06-17 18:00:00	220	221.667	1.66667	235	233.333	1.66667	no	no	no	no	no	no	no	normal		2015-06-17 18:00:00	225	223.333	7.26483	220	218.333	1.66667	no	no	no	no	no	no	no	normal		2015-06-29 18:45:00	200	206.667	4.40959	220	218.333	1.66667	no	no	no	no	no	no	no	normal
	225			230													235			215													215			215
	220			235													210			220													205			220
2015-06-22 17:30:00	240	233.333	4.40959	225	221.667	1.66667	no	no	no	no	no	no	no	normal		2015-06-22 17:30:00	235	236.667	1.66667	215	213.333	1.66667	no	no	no	no	no	no	no	normal		2015-07-06 12:10:00	220	218.333	1.66667	230	225	2.88675	mild	no	no	bend	no	no	no	normal
	235			220													235			210													215			220
	225			220													240			215													220			225
2015-06-26 18:00:00	235	233.333	1.66667	220	215	2.88675	no	no	no	no	no	no	no	normal		2015-06-26 18:00:00	235	228.333	3.33333	210	205	2.88675	no	no	no	no	no	no	no	normal		2015-07-10 17:25:00	230	236.667	3.33333	210	210	0	mild	no	no	no	no	no	no	normal
	230			215													225			205													240			210
	235			210													225			200													240			210
2015-06-29 18:45:00	230	230	2.88675	220	216.667	3.33333	no	no	no	no	no	no	no	normal		2015-06-29 18:45:00	220	226.667	4.40959	205	208.333	1.66667	mild	no	no	no	no	no	no	normal		2015-07-13 08:20:00	260	253.333	3.33333	225	221.667	1.66667	mild	no	no	no	no	no	no	normal
	235			210													225			210													250			220
	225			220													235			210													250			220
2015-07-02 11:15:00	260	265	2.88675	220	221.667	1.66667	mild	no	no	no	no	no	no	normal		2015-07-02 11:15:00	255	255	2.88675	195	196.667	1.66667	mild	no	no	no	no	no	no	normal		2015-07-16 08:50:00	290	293.333	6.00925	220	218.333	1.66667	mild	no	no	no	no	no	no	normal
	270			225													260			200													305			220
	265			220													250			195													285			215
2015-07-04 09:15:00	285	280	2.88675	220	223.333	1.66667	mild	no	no	no	no	no	no	normal		2015-07-04 09:15:00	260	258.333	1.66667	215	216.667	1.66667	mild	no	no	no	no	no	no	normal		2015-07-18 19:45:00	300	303.333	3.33333	230	230	0	definite	dry	no	no	no	no	no	normal
	280			225													260			215													300			230
	275			225													255			220													310			230
2015-07-06 12:10:00	305	298.333	4.40959	225	225	2.88675	definite	no	no	bend	no	no	no	normal		2015-07-06 12:10:00	315	306.667	4.40959	205	206.667	1.66667	definite	no	no	bend	no	no	no	normal		2015-07-20 09:30:00	315	315	0	230	231.667	1.66667	definite	no	no	no	no	no	no	normal
	300			230													300			210													315			230
	290			220													305			205													315			235
2015-07-08 10:15:00	415	413.333	1.66667	225	226.667	1.66667	definite	no	dry	no	no	no	no	normal		2015-07-08 10:15:00	420	401.667	10.1379	220	221.667	1.66667	severe	no	no	no	no	no	no	normal		2015-07-22 09:05:00	420	415	2.88675	235	233.333	1.66667	severe	no	no	no	no	no	no	normal
	415			225													400			220													415			235
	410			230													385			225													410			230
2015-07-10 17:25:00	480	473.333	3.33333	220	216.667	1.66667	definite	dry	dry	bend	no	no	no	normal		2015-07-10 17:25:00	550	535	8.66025	225	220	2.88675	severe	dry	dry	no	no	no	no	normal		2015-07-24 18:15:00	495	500	2.88675	235	236.667	1.66667	severe	dry	dry	no	no	no	no	normal
	470			215													520			220													500			240
	470			215													535			215													505			235
2015-07-12 17:10:00	550	548.333	1.66667	230	235	2.88675	severe	dry	dry	no	no	no	no	normal		2015-07-12 17:10:00	630	623.333	3.33333	240	240	0	severe	dry	dry	no	no	mild	no	normal		2015-07-26 20:15:00	500	498.333	1.66667	220	225	2.88675	severe	dry	dry	no	no	no	no	normal
	550			235													620			240													500			225
	545			240													620			240													495			230
